# Supplementary material for: Men, the Missing Link in Gender-equitable Family Planning
Source: Research Square preprint supplement (doi:10.21203/rs.3.rs-362090/v1), 2021-04-20
Supplement: Supplementary file 1 [file 782365677733c1d6f2ba8092.pdf]

### Pubmed Search Strategy

**Articles:** Comparative study, Evaluation Studies, Journal Articles, Meta-Analysis, Observational Studies, Personal Narrative, RCTs, Systematic Reviews, Validation Studies

**Publication Dates:** 2012/01/01 to 2018/12/31

**Ages:** Adoloescent 13-18 years, young adults: 19-24 years

Mix of MeSH and non-MeSH terms have been used in the search strategy. Non-MeSH were brought in as they were non-negotiables for our project.

#### Selected

| Keywords                                                                                                                                                                                                 | Number of results |
|----------------------------------------------------------------------------------------------------------------------------------------------------------------------------------------------------------|-------------------|
| ("Reproductive Behavior"[Mesh]) OR "Birth Intervals/psychology"[Mesh] OR family planning AND "Decision Making"[Mesh] AND men                                                                             | 81                |
| ("Reproductive Behavior/psychology"[Mesh] OR "Reproductive Behavior/trends"[Mesh] ) OR "Birth Intervals/psychology"[Mesh] OR family planning AND "Decision Making"[Mesh] AND men                         | 69                |
| (("Interpersonal Relations"[Mesh]) OR "Marriage"[Mesh]) AND "Personal Autonomy"[Mesh] OR family planning AND "Decision Making"[Mesh] AND men                                                             | 61                |
| (("Reproductive Behavior"[Mesh]) OR "Birth Intervals/psychology"[Mesh] OR family planning [TIAB] [Mesh]) AND OR coercion OR choice OR gender OR norms AND men AND "Decision Making" NOT cancer NOT women | 52                |

### Search strategy for Jstor

For the purpose of the current evidence synthesis around Engaging Men in Family Planning, JStor would be used to as one of the databases wherein the following filters and keywords would be used:

- Age cohort: 15-49 years
- Years: 2000/2012-2018 (where results are significantly less for 2012-2018)
- 1. Population: Men, couples

| S.no | Search                                                                                                                                    | Results |
|------|-------------------------------------------------------------------------------------------------------------------------------------------|---------|
| 1.   | ((spousal communication ) AND (men )) AND (family planning)) AND la:(eng OR en)                                                           | 105     |
| 6.   | ((family planning intervention) AND (men )) AND (gender relations )) AND (contraception )) AND (reproductive behavior) AND la:(eng OR en) | 50      |
